# Supplementary material for: A highly fluorescent pH sensing membrane for the alkaline pH range incorporating a BODIPY dye
Source: Royal Society of Chemistry journal article supplement (doi:10.1039/c2an35860c), 2012-10-03
Supplement: c2an35860c.pdf [file c2an35860c.pdf]

**Electronic Supplementary information**

# A highly fluorescent pH sensing membrane for the alkaline pH range incorporating a BODIPY dye

*Mandy Hecht, Werner Kraus, Knut Rurack \**

|                                                                                                              |     |
|--------------------------------------------------------------------------------------------------------------|-----|
| Figure S1 <sup>1</sup> H NMR and <sup>13</sup> C NMR spectra of compound <b>1</b> in CDCl <sub>3</sub> ..... | S2  |
| Figure S2 ESEM images .....                                                                                  | S3  |
| Figure S3 Fluorescence spectra of films of various thicknesses and dye concentrations .....                  | S4  |
| Figure S4 Absorption spectra of <b>1</b> in the presence of certain anions .....                             | S4  |
| Figure S5 Response of BDP-OH to various anions under UV-light .....                                          | S4  |
| Figure S6 Response of sensor matrix to various pH as assessed by cell phone photographs .....                | S5  |
| Table S1 Formal XPS elemental composition .....                                                              | S5  |
| Table S2 Fluorescence and pH data of three different realistic samples .....                                 | S5  |
| 1 Detailed description of X-ray structural analysis (Tables S3, S4, Figures S7, S8) .....                    | S6  |
| 2 Quantum chemical calculation results of <b>1</b> and its deprotonated form (Figure S9, Table S5).....      | S10 |
| 3 References .....                                                                                           | S14 |

**a**

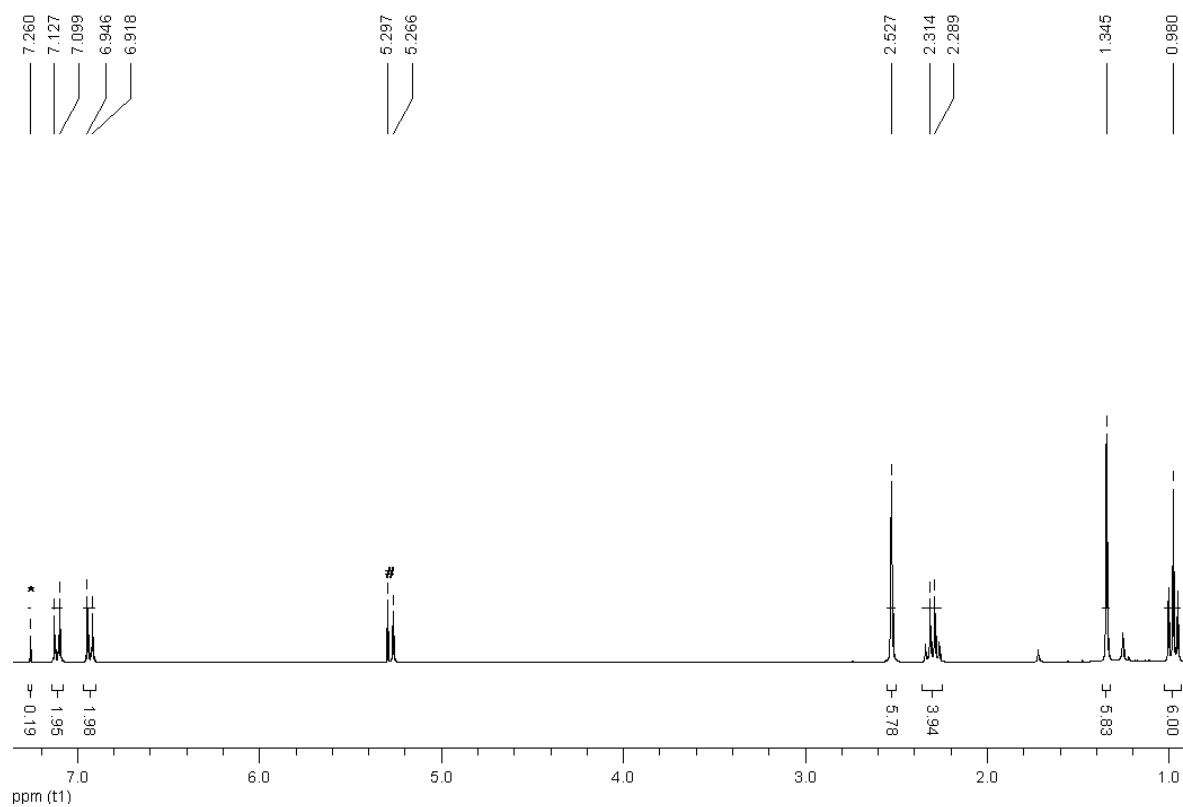

**b**

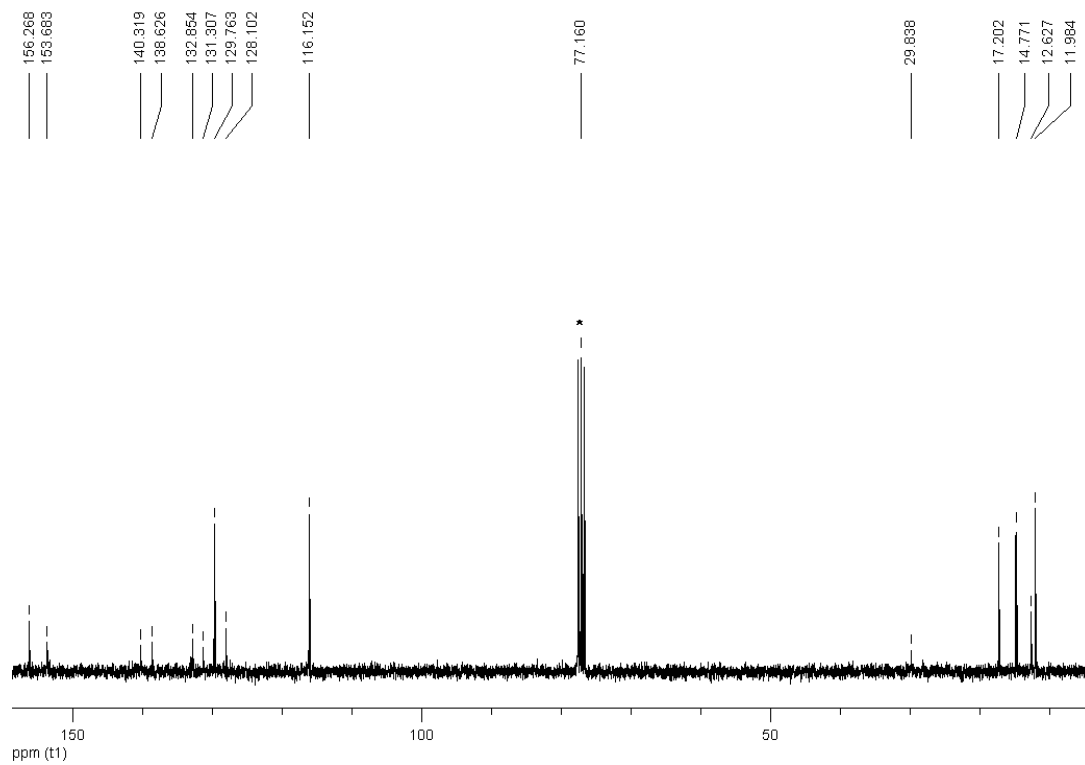

**Figure S1.**  $^1\text{H}$  NMR (a) and  $^{13}\text{C}$  NMR (b) of **1** in  $\text{CDCl}_3$ . \* and # indicate the residual solvent signals and  $\text{CH}_2\text{Cl}_2$  impurities, respectively.

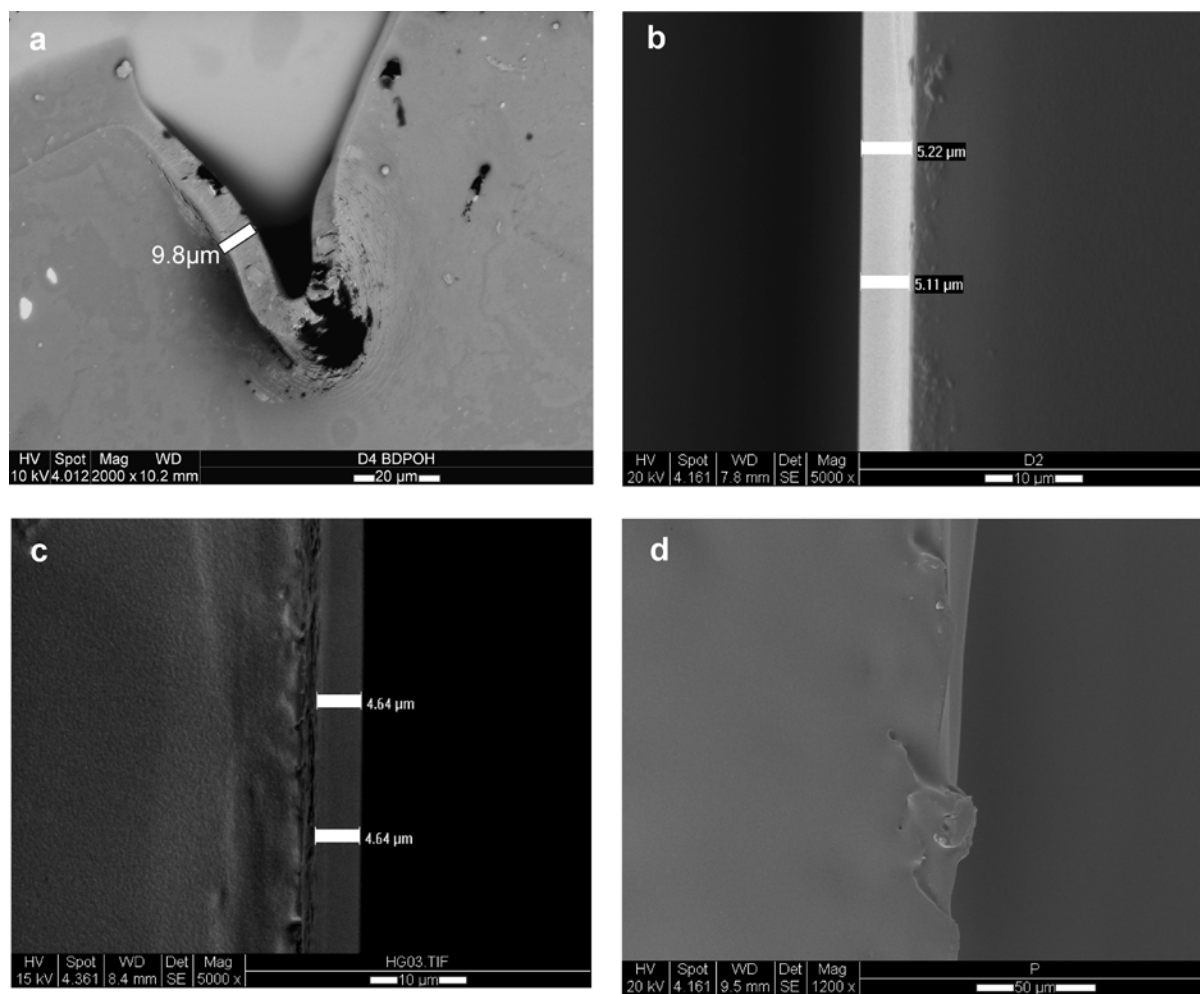

**Figure S2.** a) Detached polymer on glass support; variation of film thickness on glass support b) D2C1 c) D3D1; d) polymer D4 on polymer support.

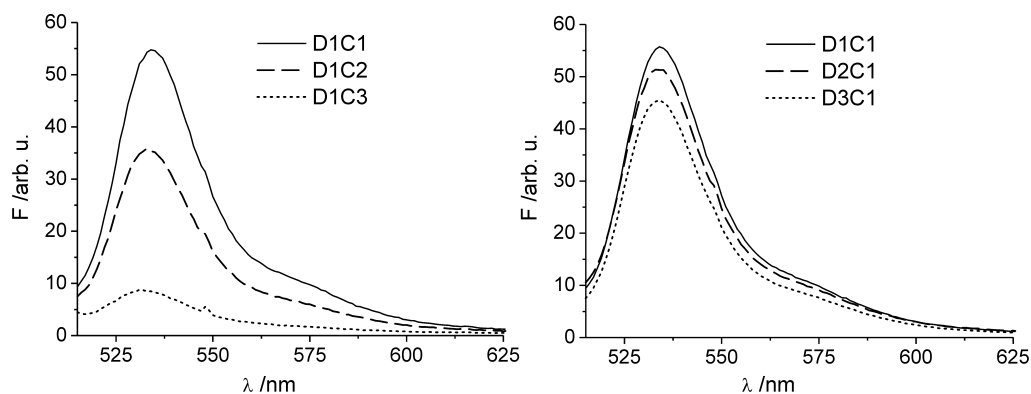

Figure S3. Variation of film thickness (left) and dye concentration (right), see Table 1.

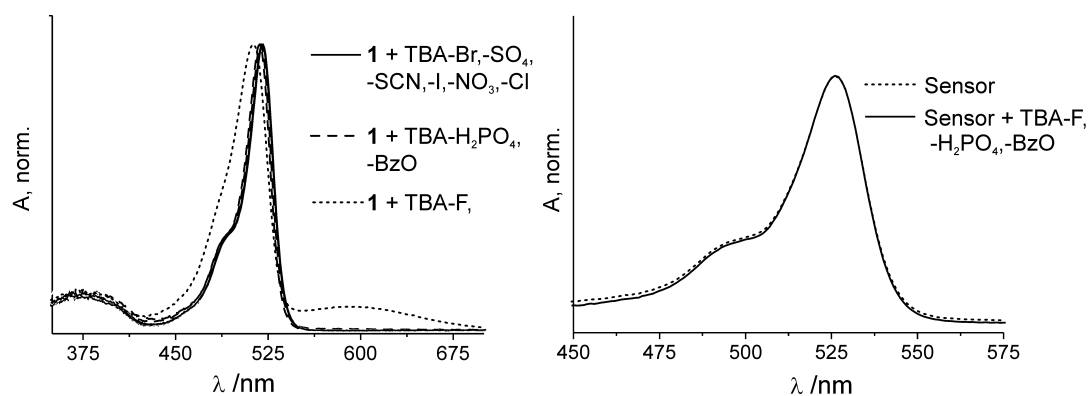

Figure S4. Absorption spectra of **1** in MeCN and of the sensor film in water upon addition of relevant anions ( $c_{\text{anion}} = 7.5 \mu\text{M}$ ).

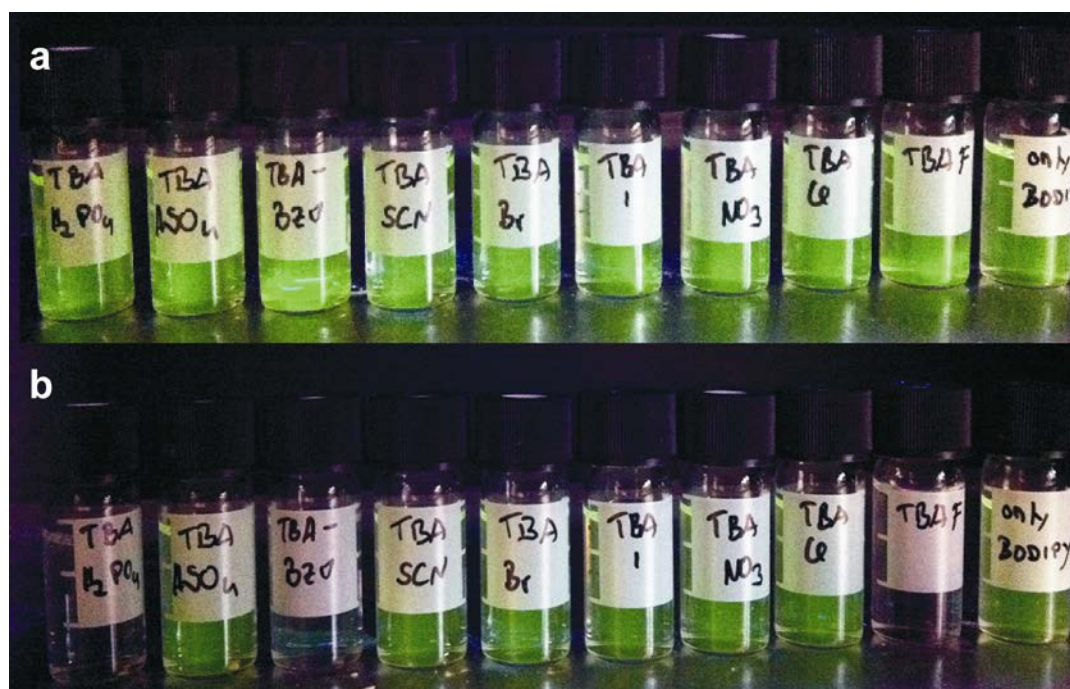

Figure S5. Visible response of **1** to various anions under UV-light a) in EtOH/H<sub>2</sub>O b) in MeCN.

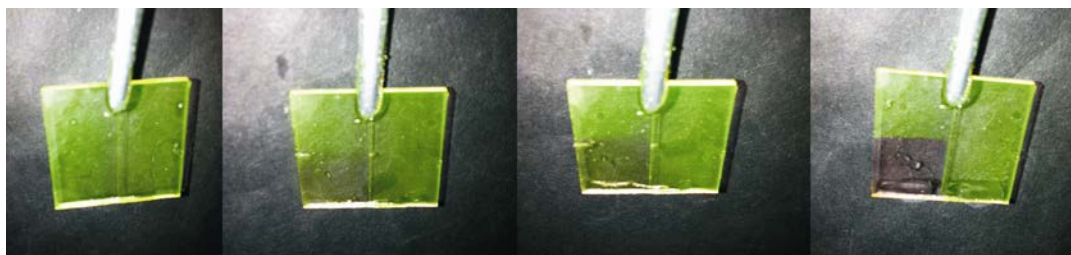

**Figure S6.** Visible response of the sensor to pH (left to right: pH = 9.0; 10.5; 11.2; 13.0). RGB values were determined using the image editing program GIMP 2.6. and were mathematically transferred to their corresponding CIE values. The average of the colour ratios of sensor 1 and reference 2 were plotted against pH.

**Table S1.** Formal XPS elemental compositions of used epoxy supports.

| <i>Element</i> | <i>Nexterion E</i> | <i>PolyAn 3D Epoxy</i> |
|----------------|--------------------|------------------------|
| Na             | 0.46               | -                      |
| O              | 62.51              | 9.57                   |
| N              | 0.30               | -                      |
| C              | 9.51               | 90.25                  |
| Si             | 23.43              | 0.26                   |
| Zn             | 0.79               | -                      |
| B              | 2.96               | -                      |
| Mg             | 1.55               | -                      |
| CO-content     | 72.02              | 99.82                  |

**Table S2.** Average fluorescence readings and corresponding pH values obtained for three different samples; samples were filtrated before measurement to remove suspended solids and fine sediments.

| <i>Spiking</i> <sup>a)</sup> | <i>Sample 1</i> <sup>b)</sup>                   |           | <i>Sample 2</i> <sup>c)</sup>                   |           | <i>Sample 3</i> <sup>d)</sup>                   |           |
|------------------------------|-------------------------------------------------|-----------|-------------------------------------------------|-----------|-------------------------------------------------|-----------|
|                              | <i>F</i> <sub>532nm</sub> / 10 <sup>6</sup> cts | <i>pH</i> | <i>F</i> <sub>532nm</sub> / 10 <sup>6</sup> cts | <i>pH</i> | <i>F</i> <sub>532nm</sub> / 10 <sup>6</sup> cts | <i>pH</i> |
| no                           | 4.97 ± 0.11                                     | 7.44      | 4.83 ± 0.11                                     | 7.93      | 4.76 ± 0.10                                     | 7.51      |
| yes                          | 2.89 ± 0.06                                     | 11.34     | 2.17 ± 0.04                                     | 11.56     | 2.79 ± 0.05                                     | 11.40     |

<sup>a)</sup> All samples (2.5 mL) were spiked with 0.3 mL 0.1 M KOH. <sup>b)</sup> Sample 1: surface water from Landwehrkanal, river kilometre 6.1 (Hallesches Tor), Berlin. <sup>c)</sup> Sample 2: influent water from sewage treatment plant "Teltowkanal Wassmannsdorf", Berlin. <sup>d)</sup> Sample 3: effluent from same sewage treatment plant.

## 1 X-ray structural analysis

Besides the results given in the main text and listed in Tables S2 and S3, the average B-N bond lengths is around 1.537(3) Å, whereas the B-F bond lengths differ from 1.384(2) Å (B1-F2) and 1.416(3) Å for B1-F1, the latter resulting in an interaction between the OH group and F1 with  $d_{\text{OH-F}} = 1.943$  Å and  $d_{\text{O-F}} = 2.795$  Å. This intermolecular interaction creates chains of molecules in the diagonal a-c direction (Figure S7). The molecular packing in the crystal structure is given in Figure S8. Due to the centro symmetry and the arrangement of the molecules, the  $\pi$ - $\pi$  stacking between adjacent pyrromethene rings was not observed in the crystal packing.

The N1-B-N2, F1-B-F2, N1-B-F2, and N2-B-F1 angles are 107.75(15)°, 108.11(16)°, 111.72(17)°, and 109.40(17)°, respectively. These data are in good agreement with the corresponding values of the BF<sub>2</sub>N<sub>2</sub> tetrahedron configurations published previously for related analogues<sup>1,2</sup>.

**Table S3.** Crystal data and structure refinement for **1**.

|                                                   | <b>1</b>                                                              |
|---------------------------------------------------|-----------------------------------------------------------------------|
| Empirical formula                                 | C <sub>23</sub> H <sub>27</sub> BF <sub>2</sub> N <sub>2</sub> O      |
| Formula weight                                    | 396.28                                                                |
| Temperature [K]                                   | 296(2)                                                                |
| Wavelength [Å]                                    | 0.71073                                                               |
| Crystal system, space group                       | monoclinic, P2(1)/n (No. 14)                                          |
| Unit cell dimensions [Å, °]                       | a = 10.5132(16)<br>b = 10.5783(16)<br>c = 19.315(16)<br>β = 97.647(9) |
| Volume [Å <sup>3</sup> ]                          | 2128.9(5)                                                             |
| Z / Calculated density [g/cm <sup>3</sup> ]       | 4 / 1.236                                                             |
| Absorption coefficient [mm <sup>-1</sup> ]        | 0.087                                                                 |
| F(000)                                            | 840                                                                   |
| Crystal size [mm]                                 | 0.31 x 0.28 x 0.09                                                    |
| θ range for data collection [°]                   | 2.10 to 27.50                                                         |
| Limiting indices                                  | -13 ≤ h ≤ 8,<br>-13 ≤ k ≤ 13,<br>-24 ≤ l ≤ 24                         |
| Reflections collected / unique                    | 16033 / 4826                                                          |
| R(int)                                            | 0.1049                                                                |
| Absorption correction                             | semi-empirical from equivalents                                       |
| Refinement method                                 | Full-matrix least-squares on F <sup>2</sup>                           |
| Data / restraints / parameters                    | 4826 / 0 / 266                                                        |
| Goodness-of-fit on F <sup>2</sup>                 | 0.855                                                                 |
| Final R indices [I > 2σ(I)]                       | R1 = 0.0531, wR2 = 0.1310                                             |
| R indices (all data)                              | R1 = 0.0996, wR2 = 0.1484                                             |
| Largest diff. peak and hole [e / Å <sup>3</sup> ] | 0.230 and -0.231                                                      |

**Table S4.** Selected bond lengths and angles for **1**.

| Distance [Å] | BDP-OH   | Angle [°]      | BDP-OH     |
|--------------|----------|----------------|------------|
| N1 - B1      | 1.538(3) | C11 - N1 - C8  | 107.77(16) |
| N2 - B1      | 1.537(3) | C11 - N1 - B1  | 126.86(17) |
| N1 - C11     | 1.357(2) | C8 - N1 - B1   | 125.24(16) |
| N1 - C8      | 1.402(2) | C13 - N2 - C12 | 108.20(16) |
| N2 - C13     | 1.356(3) | C13 - N2 - B1  | 126.41(16) |
| N2 - C12     | 1.402(2) | C12 - N2 - B1  | 125.37(15) |
| F1 - B1      | 1.416(3) | F2 - B1 - F1   | 108.11(16) |
| F2 - B1      | 1.384(2) | F2 - B1 - N2   | 111.05(17) |
| O1 - C1      | 1.374(2) | F1 - B1 - N2   | 109.40(17) |
|              |          | F2 - B1 - N1   | 111.72(17) |
|              |          | F1 - B1 - N1   | 108.77(16) |
|              |          | N2 - B1 - N1   | 107.75(15) |
|              |          | O1 - C1 - C2   | 123.10(18) |
|              |          | O1 - C1 - C6   | 117.58(18) |



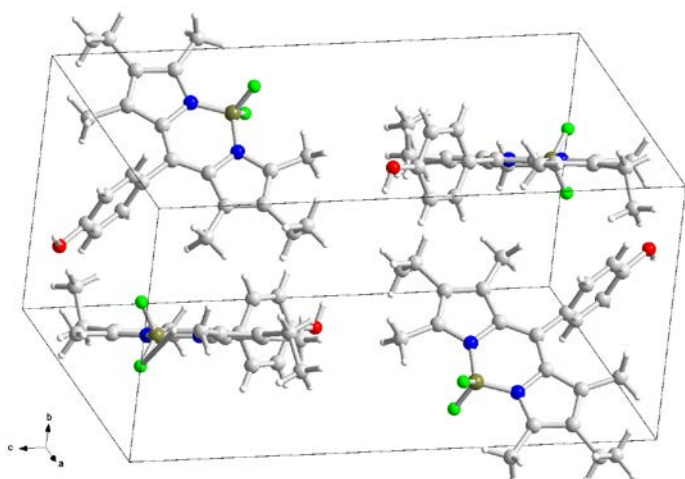

**Figure S7.** Arrangement of the molecules of **1** in the unit cell. Grey spheres denote carbon atoms, red spheres denote oxygen atoms, green spheres denote fluorine atoms, dark green spheres denote boron atoms and white spheres denote hydrogen atoms.

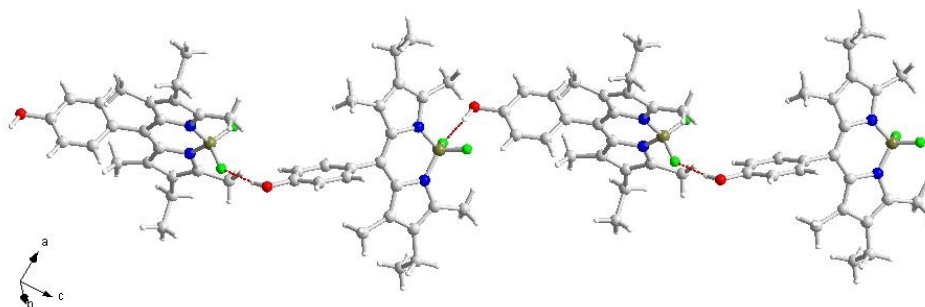

**Figure S8:** Chain of molecules of **1** with H bonds ( $d_{\text{O-H-F}} = 1.943 \text{ \AA}$   $d_{\text{O-F}} = 2.795 \text{ \AA}$ ).

## 2 Quantum chemical calculation results of **1** and its deprotonated form

Quantum chemical calculations were carried out on **1** and its deprotonated form to obtain a better understanding of the nature of the efficient quenching process in the latter. Optimization of the  $S_0$  ground state geometries in the gas phase was performed with the density functional theory (DFT) method employing the hybrid functional B3LYP with a 6-31G basis set and energy-minimized as implemented in Gaussian 03.<sup>3</sup> Figure S9 collects the frontier molecular orbitals of **1**, fully ground-state-optimized  $\mathbf{1}^-$  and the perpendicular form of  $\mathbf{1}^-$ ,  $\mathbf{1}^-(\text{perp})$ . For the latter structure, only the dihedral angles holding the central BODIPY's 6-membered ring and the *meso*-phenyl group in orthogonal orientation were fixed at  $90^\circ$  while all other coordinates of the molecule were allowed to optimize. Table S5 contains the calculated properties for the vertical excitation of the energy-minimized ground-state geometries.

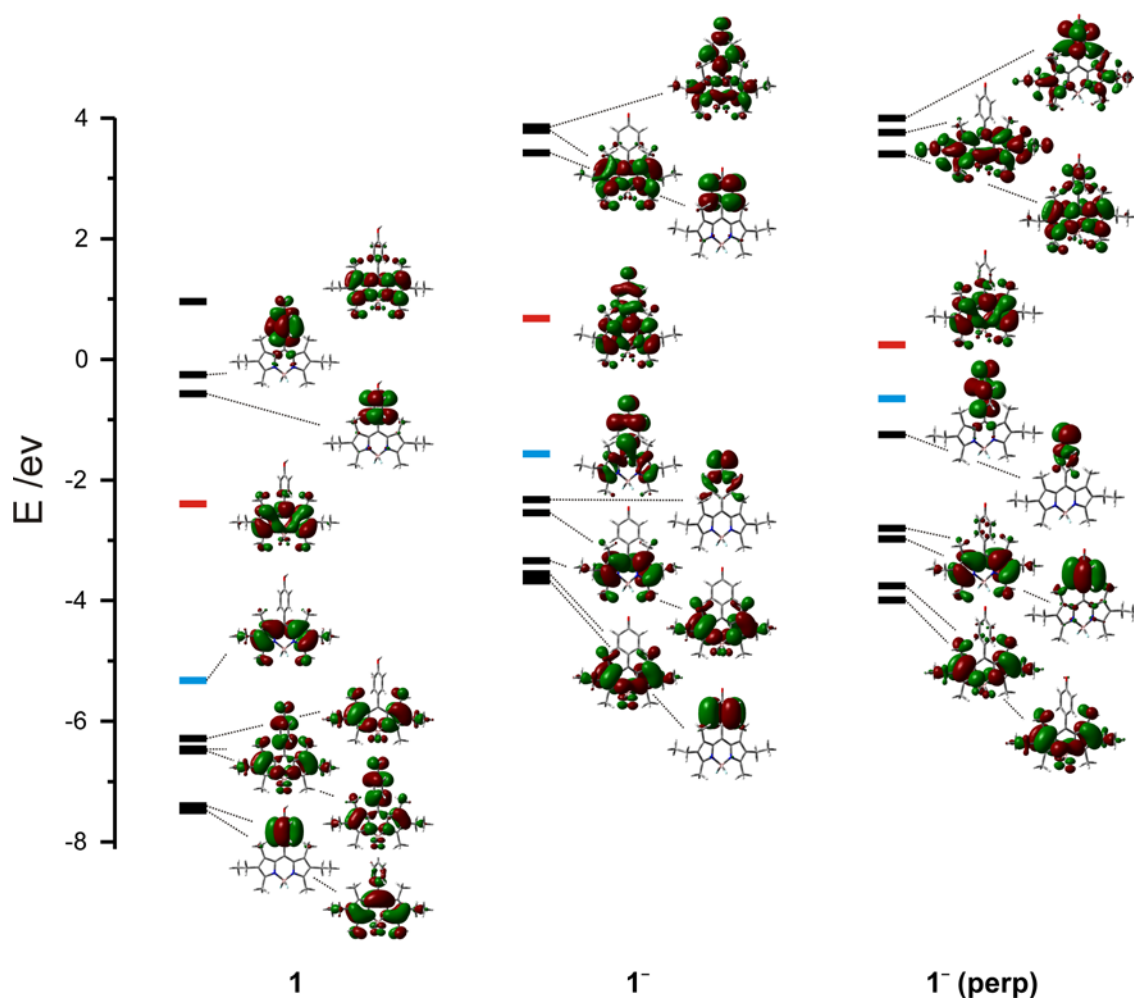

**Figure S9.** Frontier molecular orbitals of geometry-optimized **1**,  $\mathbf{1}^-$  and  $\mathbf{1}^-(\text{perp})$ ; LUMO in red, HOMO in blue.

**Table S5.** Calculated properties for the vertical excitation of the energy-minimized ground-state geometries of **1**, **1<sup>-</sup>** and **1<sup>-</sup>(perp)**.

|                            | $\lambda_{S_n \leftarrow S_0} (n)$ /nm [a] | $f$ [b] | $\Delta\mu_{S_n \leftarrow S_0}$ /D [c] | Orbitals (coefficients) [d]                |
|----------------------------|--------------------------------------------|---------|-----------------------------------------|--------------------------------------------|
| <b>1</b>                   | 430.0 (1)                                  | 0.427   | -1.6                                    | HOMO-LUMO (0.54),<br>HOMO-1-LUMO (0.29)    |
|                            | 370.8 (2)                                  | 0.250   | 0.1                                     | HOMO-LUMO (-0.22),<br>HOMO-1-LUMO (0.60)   |
|                            | 366.7 (3)                                  | 0.005   | 19.6                                    | HOMO-2-LUMO (0.47),<br>HOMO-3-LUMO (0.52)  |
|                            | 356.2 (4)                                  | 0.038   | -0.8                                    | HOMO-2-LUMO (0.49),<br>HOMO-3-LUMO (-0.45) |
|                            | 298.3 (5)                                  | 0.005   | 9.9                                     | HOMO-LUMO+1 (0.7)                          |
| <b>1<sup>-</sup></b>       | 549.5 (1)                                  | 0.160   | 1.7                                     | HOMO-LUMO (0.38),<br>HOMO-1-LUMO (0.52)    |
|                            | 541.3 (2)                                  | 0.232   | -0.4                                    | HOMO-LUMO (0.38),<br>HOMO-1-LUMO (-0.45)   |
|                            | 413.9 (3)                                  | 0.374   | 6.1                                     | HOMO-2-LUMO (0.61),<br>HOMO-3-LUMO (-0.19) |
|                            | 360.3 (4)                                  | 0.091   | 4.5                                     | HOMO-2-LUMO (0.15),<br>HOMO-3-LUMO (0.65)  |
|                            | 340.5 (5)                                  | 0.004   | -2.9                                    | HOMO-5-LUMO (0.69)                         |
| <b>1<sup>-</sup>(perp)</b> | 5216.0 (1)                                 | 0.000   | -3.4                                    | HOMO-LUMO (0.7)                            |
|                            | 1205.4 (2)                                 | 0.001   | 4.5                                     | HOMO-1-LUMO (0.7)                          |
|                            | 489.0 (3)                                  | 0.000   | -7.7                                    | HOMO-2-LUMO (0.11),<br>HOMO-3-LUMO (0.69)  |
|                            | 414.6 (4)                                  | 0.456   | 1.9                                     | HOMO-2-LUMO (0.55),<br>HOMO-4-LUMO (0.26)  |
|                            | 358.2 (5)                                  | 0.192   | -0.2                                    | HOMO-2-LUMO (-0.20),<br>HOMO-4-LUMO (0.62) |
|                            | 354.8 (6)                                  | 0.006   | -2.7                                    | HOMO-LUMO+1 (0.69)                         |

[a] Wavelength of the transition. [b] Oscillator strength of the transition. [c] Dipole moment difference between ground ( $\mu_0$ ) and respective excited ( $\mu_n$ ) state. [d] MOs involved in the transitions.

Table S5 shows that for **1** the lowest oscillator-strong transition is found at 430 nm in the gas phase, followed by a weaker transition at 371 nm and several distinctly weaker transitions up to ca. 260 nm (the next oscillator-strong transition involves  $S_8$  and is centered at 258 nm). The

high-energy deviation of the reproduction of the absolute transition energies is known for BODIPY dyes and DFT calculations, see discussion in ref. 4. However, despite this hypsochromic displacement for the gas phase transitions, DFT calculations have been found to reproduce the trends upon chemical modification of the calculated BODIPY structures rather well.<sup>4</sup> Consideration of the delocalization of the molecular orbitals involved in the  $S_1$  and  $S_2$  transitions in Figure S8 reveals that both HOMO–1 and HOMO as well as LUMO are all delocalized virtually exclusively on the BODIPY core. These transitions are thus characteristic for allowed BODIPY-centered transitions and correspond to the highly emissive dye in its protonated form. Singlet-triplet energy gaps are  $>0.8$  eV for the two lowest transitions and the only small gap of 0.04 eV found for the mixed HOMO–2/HOMO–3–LUMO transition ( $S_3$ ) does not open an efficient quenching channel because this transition is rather high-lying. Considering that the dipole moment change of this transition is rather large (19.6 D), this transition should occur as the  $S_2$  transition in a highly polar environment ( $\Delta E_{\text{MeCN}} = 3.22$  eV for gas-phase  $S_3$  and 3.34 eV for gas-phase  $S_2$ ). However, the energy difference to  $S_1$  still amounts to  $\Delta E_{S_2-S_1}(\text{MeCN}) = 0.34$  eV in a polar solvent, rendering a quenching influence less likely. The theoretical results thus reproduce well the solution findings.

The situation is different for the fully geometry-optimized  $\mathbf{1}^-$ . The calculations predict a reduction of the interannular twisting angle from  $87^\circ$  in  $\mathbf{1}$ , which agrees well with the angle found in the X-ray analysis, to  $50.2^\circ$  in  $\mathbf{1}^-$ . Along with this planarization, oscillator-strong transitions at longer wavelength are predicted, namely at 541 and 549 nm. However, the solution spectra of the deprotonated form of  $\mathbf{1}$  do not show any hints of a sizeable absorption band at wavelengths  $>530$  nm in MeCN or EtOH/H<sub>2</sub>O. Given the systematic underestimation of the absolute transition energies, such values should correspond to actual bands at  $>600$  nm, which have not been recorded in any of the solution based studies here. Apparently, the planarization obtained theoretically for the gas phase does not occur in water. We thus fixed the dihedral angles along the *meso*-bond in a perpendicular fashion and repeated the optimization process, arriving at  $\mathbf{1}^-(\text{perp})$ , which is ca.  $32 \text{ kJ mol}^{-1}$  less stable than  $\mathbf{1}^-$  in the gas phase. Table S5 shows that the results obtained for vertical excitation of  $\mathbf{1}^-(\text{perp})$  agree well with the spectroscopic results measured in solution. Two extremely low-energy-based transitions are found which both possess an oscillator strength of virtually zero and are thus strongly forbidden. These transitions involve complete orbital separation as is obvious from Figure S8; HOMO and HOMO–1 are localized entirely on the phenolate fragment whereas

LUMO is delocalized over the BODIPY core. As would be expected for such decoupled structures, singlet-triplet energy differences are very small with  $\Delta E_{S-T} = 0.01$  eV for the  $S_1/T_1$  pair and 0.02 eV for the  $S_2/T_2$  pair. Efficient non-radiative deactivation would thus be expected for  $\mathbf{1}^-$  (perp). In agreement with the solution data, the first transition of sizeable oscillator strength is found at 414 nm, i.e., slightly hypsochromically shifted compared to that of  $\mathbf{1}$  at 430 nm. Efficient intramolecular electron transfer-type quenching is thus the main deactivation pathway in  $\mathbf{1}^-$ . Since  $\mathbf{1}^-$  is expected to decay non-radiatively and shows blue-shifted absorption spectra, the experimental findings of a slight blue-shift in absorption and virtually no shift in fluorescence are well-supported by theory.

### 3 References

1. Y.-H. Yu, Z. Shen, H.-Y. Xu, Y.-W. Wang, T. Okujima, N. Ono, Y.-Z. Li and X.-Z. You, *J. Mol. Struct.*, 2007, **827**, 130-136.
2. R. Ziessel, L. Bonardi, P. Retailleau and G. Ulrich, *J. Org. Chem.*, 2006, **71**, 3093-3102.
3. M. J. Frisch et al. Gaussian 03, revision D.01, Gaussian, Inc., Wallingford CT, 2004.
4. Y.-W. Wang, A. B. Descalzo, Z. Shen, X.-Z. You, K. Rurack, *Chem. Eur. J.*, 2010, **16**, 2887-2903.
